# Supplementary material
Source: PubMed Central journal article supplement (PMC9264214)
Supplement: jamaoncol-e222617-s001.pdf [file jamaoncol-e222617-s001.pdf]

## Supplemental Online Content

Teglia F, Angelini M, Astolfi L, Casolari G, Boffetta P. Global association of COVID-19 pandemic measures with cancer screening: a systematic review and meta-analysis. *JAMA Oncol*. Published online July 7, 2022. doi:10.1001/jamaoncol.2022.2617

**eTable 1.** Characteristics of Breast Cancer Screening Studies

**eTable 2.** Characteristics of Colorectal Cancer Screening Studies

**eTable 3.** Characteristics of Cervical Cancer Screening Studies

**eTable 4.** Weighted Average Variation of Screening Tests Performed From January to October 2020 Compared With the Prepandemic, Divided by Cancer Type, and by Periods and Overall Interval

**eReferences.**

This supplemental material has been provided by the authors to give readers additional information about their work.

**eTable 1.** Characteristics of Breast Cancer Screening Studies

| Reference | Country | Contrast period                      | Period on exam                       | Setting and database                                                                                                                                                                                                                              | Screening method | Quality assesment |
|-----------|---------|--------------------------------------|--------------------------------------|---------------------------------------------------------------------------------------------------------------------------------------------------------------------------------------------------------------------------------------------------|------------------|-------------------|
| (1)       | Italy   | January 01, 2019 - May 31, 2019      | January 01, 2020 - May 31, 2020      | National database                                                                                                                                                                                                                                 | Mammography*     | 10                |
| (2)       | USA     | January 01, 2019 - February 28, 2019 | January 01, 2020 - February 29, 2020 | HealthCore Integrated Research Database                                                                                                                                                                                                           | Mammography      | 10                |
|           | USA     | March 01, 2019 - March 31, 2019      | March 01, 2020 - March 31, 2020      | HealthCore Integrated Research Database                                                                                                                                                                                                           | Mammography      | 10                |
|           | USA     | April 01, 2019 - April 30, 2019      | April 01, 2020 - April 30, 2020      | HealthCore Integrated Research Database                                                                                                                                                                                                           | Mammography      | 10                |
|           | USA     | May 01, 2019 - May 31, 2019          | May 01, 2020 - May 31, 2020          | HealthCore Integrated Research Database                                                                                                                                                                                                           | Mammography      | 10                |
|           | USA     | June 01, 2019 - July 31, 2019        | June 01, 2020 - July 31, 2020        | HealthCore Integrated Research Database                                                                                                                                                                                                           | Mammography      | 10                |
| (3)       | USA     | July 1, 2019 - July 31, 2019         | July 1, 2020 - July 31, 2020         | American Cancer Society's Community Health Advocates Implementing Nationwide Grants for Empowerment and Equity (CHANGE)                                                                                                                           | Mammography      | 9.5               |
| (4)       | USA     | January 01, 2019 - February 28, 2019 | January 01, 2020 - February 29, 2020 | Kaiser Permanente Washington Registry, Metropolitan Chicago Breast Cancer Registry, New Hampshire Mammography Network, Sacramento Area Breast Imaging Registry, San Francisco Mammography Registry, and Vermont Breast Cancer Surveillance System | Mammography      | 10                |
|           | USA     | March 01, 2019 - March 31, 2019      | March 01, 2020 - March 31, 2020      | Kaiser Permanente Washington Registry, Metropolitan Chicago Breast Cancer Registry, New Hampshire Mammography Network, Sacramento Area Breast Imaging Registry, San Francisco Mammography Registry, and Vermont Breast Cancer Surveillance System | Mammography      | 10                |
|           | USA     | April 01, 2019 - April 30, 2019      | April 01, 2020 - April 30, 2020      | Kaiser Permanente Washington Registry, Metropolitan Chicago Breast Cancer Registry, New Hampshire Mammography Network, Sacramento Area Breast Imaging Registry, San Francisco Mammography Registry, and Vermont Breast Cancer Surveillance System | Mammography      | 10                |
|           | USA     | May 01, 2019 - May 31, 2019          | May 01, 2020 - May 31, 2020          | Kaiser Permanente Washington Registry, Metropolitan Chicago Breast Cancer Registry, New Hampshire Mammography Network, Sacramento Area Breast Imaging Registry, San Francisco Mammography Registry, and Vermont Breast Cancer Surveillance System | Mammography      | 10                |
|           | USA     | June 01, 2019 - July 31, 2019        | June 01, 2020 - July 31, 2020        | Kaiser Permanente Washington Registry, Metropolitan Chicago Breast Cancer Registry, New Hampshire Mammography Network, Sacramento Area Breast Imaging Registry, San Francisco Mammography Registry, and Vermont Breast Cancer Surveillance System | Mammography      | 10                |
| (5)       | USA     | April 01, 2019 - April 30, 2019      | April 01, 2020 - April 30, 2020      | The National Breast and Cervical Cancer Early Detection Program (NBCCEDP)                                                                                                                                                                         | Mammography      | 9.5               |
|           | USA     | May 01, 2019 - May 31, 2019          | May 01, 2020 - May 31, 2020          | The National Breast and Cervical Cancer Early Detection Program (NBCCEDP)                                                                                                                                                                         | Mammography      | 9.5               |

|      |         |                                     |                                     |                                                                                                                                                  |              |     |
|------|---------|-------------------------------------|-------------------------------------|--------------------------------------------------------------------------------------------------------------------------------------------------|--------------|-----|
| (6)  | USA     | January 15, 2019 - March 12, 2020   | March 13, 2020 - July 31, 2020      | Castlight Health Insurance database                                                                                                              | Mammography  | 9   |
| (7)  | Turkey  | March 11, 2019 - March 10, 2020     | March 11, 2020 - March 21, 2021     | Tokat Gaziosmanpasa University (TOGU) Faculty of Medicine General Surgery Clinic                                                                 | Mammography  | 9.5 |
| (8)  | USA     | January 1, 2020 - March 30, 2020    | March 11, 2020 - July 28, 2020      | Indipendence Bòue Cross for women data                                                                                                           | Mammography  | 9.5 |
| (9)  | France  | March 1, 2019 - May 31, 2019        | March 1, 2020 - May 31, 2020        | Reims University Hospital and Cancer Institute (Grand East region in France) and Colmar General Hospital (Grand East region in France) registers | Mammography* | 9.5 |
| (10) | Taiwan  | January 01, 2019 - April 30, 2019   | January 01, 2020 - April 30, 2020   | National Screening database                                                                                                                      | Mammography  | 9.5 |
| (11) | USA     | January 1, 2019 - February 28, 2019 | January 1, 2020 - February 29, 2020 | TriNetX Research Network                                                                                                                         | Mammography* | 9.5 |
|      | USA     | March 1, 2019 - March 31, 2019      | March 1, 2020 - March 31, 2020      | TriNetX Research Network                                                                                                                         | Mammography* | 9.5 |
|      | USA     | April 1, 2019 - April 30, 2019      | April 1, 2020 - April 30, 2020      | TriNetX Research Network                                                                                                                         | Mammography* | 9.5 |
| (12) | USA     | March 1, 2019 - March 31, 2019      | March 01, 2020 - March 31, 2020     | Proprietary provider clearinghouse registry                                                                                                      | Mammography* | 9.5 |
|      | USA     | April 1, 2019 - April 30, 2019      | April 1, 2020 - April 30, 2020      | Proprietary provider clearinghouse registry                                                                                                      | Mammography* | 9.5 |
|      | USA     | May 1, 2019 - May 31, 2019          | May 1, 2020 - May 31, 2020          | Proprietary provider clearinghouse registry                                                                                                      | Mammography* | 9.5 |
|      | USA     | June 01, 2019 - July 31, 2019       | June 1, 2020 - July 31, 2020        | Proprietary provider clearinghouse registry                                                                                                      | Mammography* | 9.5 |
| (13) | Taiwan  | March 01, 2019 - March 31, 2019     | March 01, 2020 - March 31, 2020     | National Cancer Register                                                                                                                         | Mammography* | 7   |
|      | Taiwan  | April 01, 2019 - April 30, 2019     | April 01, 2020 - April 30, 2020     | National Cancer Register                                                                                                                         | Mammography* | 7   |
|      | Taiwan  | May 01, 2019 - May 31, 2019         | May 01, 2020 - May 31, 2020         | National Cancer Register                                                                                                                         | Mammography* | 7   |
| (14) | USA     | March 16, 2019 - October 31, 2019   | March 16, 2020 - October 31, 2020   | Taiwanese breast cancer screening program                                                                                                        | Mammography  | 8   |
| (15) | Canada  | January 1, 2019 - December 31, 2019 | January 1, 2020 - December 31, 2020 | OBSP's Integrated Client Management System (ICMS)                                                                                                | Mammography  | 7   |
| (16) | USA     | January 1, 2019 - March 2, 2020     | March 3, 2020 - May 21, 2020        | 7 breast imaging facilities in the University of North Carolina (UNC) Health system                                                              | Mammography  | 10  |
|      | USA     | January 1, 2019 - March 2, 2020     | May 22, 2020 - September 30, 2020   | 7 breast imaging facilities in the University of North Carolina (UNC) Health system                                                              | Mammography  | 10  |
| (17) | USA     | January 15, 2019 - March 13, 2020   | April 1, 2020 - April 30, 2020      | health benefits manager Castlight Health                                                                                                         | Mammography* | 7.5 |
|      | USA     | January 15, 2020 - March 13, 2020   | May 1, 2020 - July 31, 2020         | health benefits manager Castlight Health                                                                                                         | Mammography* | 7.5 |
| (18) | Uruguay | March 16, 2019 - April 30, 2019     | March 16, 2020 - April 30, 2020     | Oncology Electronic Health Record                                                                                                                | Mammography* | 9.5 |
|      | Uruguay | May 01, 2019 - May 31, 2019         | May 01, 2020 - May 31, 2020         | Oncology Electronic Health Record                                                                                                                | Mammography* | 9.5 |
|      | Uruguay | June 01, 2019 - June 30, 2019       | June 01, 2020 - June 30, 2020       | Oncology Electronic Health Record                                                                                                                | Mammography* | 9.5 |

|      |        |                                     |                                     |                                                                      |              |     |
|------|--------|-------------------------------------|-------------------------------------|----------------------------------------------------------------------|--------------|-----|
|      | Mexico | April 01, 2019 - April 30, 2019     | April 01, 2020 - April 30, 2020     | Hospital General de México, Planning Department                      | Mammography* | 9.5 |
|      | Mexico | May 01, 2019 - May 31, 2019         | May 01, 2020 - May 31, 2020         | Hospital General de México, Planning Department                      | Mammography* | 9.5 |
|      | Mexico | June 01, 2019 - June 30, 2019       | June 01, 2020 - June 30, 2020       | Hospital General de México, Planning Department                      | Mammography* | 9.5 |
|      | Mexico | April 01, 2019 - April 30, 2019     | April 01, 2020 - April 30, 2020     | Instituto Nacional del Cancerología                                  | Mammography* | 9.5 |
|      | Mexico | May 01, 2019 - May 31, 2019         | May 01, 2020 - May 31, 2020         | Instituto Nacional del Cancerología                                  | Mammography* | 9.5 |
|      | Mexico | June 01, 2019 - June 30, 2019       | June 01, 2020 - June 30, 2020       | Instituto Nacional del Cancerología                                  | Mammography* | 9.5 |
|      | Perù   | March 16, 2019 - April 30, 2019     | March 16, 2020 - June 30, 2020      | IAFAS of Oncosalud                                                   | Mammography* | 9.5 |
|      | Brazil | March 16, 2019 - April 30, 2019     | March 16, 2020 - April 30, 2020     | Ministry of Health. DATASUS                                          | Mammography* | 9.5 |
|      | Brazil | May 01, 2019 - May 31, 2019         | May 01, 2020 - May 31, 2020         | Ministry of Health. DATASUS                                          | Mammography* | 9.5 |
|      | Brazil | June 01, 2019 - June 30, 2019       | June 01, 2020 - June 30, 2020       | Ministry of Health. DATASUS                                          | Mammography* | 9.5 |
| (19) | USA    | April 01, 2019 - December 31, 2019  | April 01, 2020 - December 31, 2020  | Statewide nonprofit community health care system in Washington State | Mammography  | 7.5 |
| (20) | USA    | March 19, 2019 - May 9, 2019        | March 19, 2020 - May 9, 2020        | Private Medical Center in Midwest                                    | Mammography  | 8   |
| (21) | USA    | January 1, 2019 - December 31, 2019 | January 1, 2020 - December 31, 2020 | Safety-net hospital in San Francisco.                                | Mammography  | 9   |
|      | USA    | January 1, 2019 - December 31, 2019 | March 1, 2020 - March 31, 2020      | Safety-net hospital in San Francisco.                                | Mammography  | 9   |
|      | USA    | January 1, 2019 - December 31, 2019 | April 1, 2020 - April 30, 2020      | Safety-net hospital in San Francisco.                                | Mammography  | 9   |

\*Observations with impute number of daily events in order to calculate the weighted variation.

**eTable 2.** Characteristics of Colorectal Cancer Screening Studies

| Reference | Country | Contrast period                     | Period on exam                     | Setting and database                                   | Screening method                                                                    | Quality assesment |
|-----------|---------|-------------------------------------|------------------------------------|--------------------------------------------------------|-------------------------------------------------------------------------------------|-------------------|
| (1)       | Italy   | January 01,2019 - May 31,2019       | January 01, 2020 - May 31,2020     | Regional Database                                      | FIT and rectosigmoidoscopy*                                                         | 10                |
| (22)      | India   | January 01, 2020 - January 31, 2020 | March 01, 2020 - March 31, 2020    | Tertiary cancer center                                 | Colonoscopy                                                                         | 9.5               |
|           | India   | January 01, 2020 - January 31, 2020 | April 01,2020 - April 30, 2020     | Tertiary cancer center                                 | Colonoscopy                                                                         | 9.5               |
|           | India   | January 01, 2020 - January 31, 2020 | May 01 2020 - May 31, 2020         | Tertiary cancer center                                 | Colonoscopy                                                                         | 9.5               |
| (2)       | USA     | January 01,2019 - February 28,2019  | January 01,2020 - February 29,2020 | HealthCore Integrated Research Database                | FOBT/FIT and colonoscopy, flexible sigmoidoscopy, computerized tomography for colon | 10                |
|           | USA     | March 01, 2019 - March 31, 2019     | March 01, 2020 - March 31, 2020    | HealthCore Integrated Research Database                | FOBT/FIT and colonoscopy, flexible sigmoidoscopy, computerized tomography for colon | 10                |
|           | USA     | April 01,2019 - April 30, 2019      | April 01,2020 - April 30, 2020     | HealthCore Integrated Research Database                | FOBT/FIT and colonoscopy, flexible sigmoidoscopy, computerized tomography for colon | 10                |
|           | USA     | May 01 2019 - May 31, 2019          | May 01 2020 - May 31, 2020         | HealthCore Integrated Research Database                | FOBT/FIT and colonoscopy, flexible sigmoidoscopy, computerized tomography for colon | 10                |
|           | USA     | June 01, 2019 - July 31, 2019       | June 01, 2020 - July 31, 2020      | HealthCore Integrated Research Database                | FOBT/FIT and colonoscopy, flexible sigmoidoscopy, computerized tomography for colon | 10                |
| (23)      | France  | January 01, 2020 - March 15, 2020   | March 16, 2020 - May 12, 2020      | Programme de médicalisation des systèmes d'information | Colonoscopy                                                                         | 9                 |
| (6)       | USA     | January 15, 2019 - March 12, 2020   | March 13, 2020 - July 31, 2020     | Castlight Health Insurance databse                     | Colonoscopy                                                                         | 9                 |
| (12)      | USA     | March 01, 2019 - March 31, 2019     | March 01, 2020 - March 31, 2020    | Medicare fee-for-service (FFS) claims                  | FOBT/FIT*                                                                           | 9.5               |
|           | USA     | April 01,2019 - April 30, 2019      | April 01,2020 - April 30, 2020     | Medicare fee-for-service (FFS) claims                  | FOBT/FIT*                                                                           | 9.5               |
|           | USA     | May 01 2019 - May 31, 2019          | May 01 2020 - May 31, 2020         | Medicare fee-for-service (FFS) claims                  | FOBT/FIT*                                                                           | 9.5               |
|           | USA     | June 01,2019 - June 30, 2019        | June 01,2020 - June 30, 2020       | Medicare fee-for-service (FFS) claims                  | FOBT/FIT*                                                                           | 9.5               |

|      |         |                                      |                                        |                                                                                                                                                             |              |     |
|------|---------|--------------------------------------|----------------------------------------|-------------------------------------------------------------------------------------------------------------------------------------------------------------|--------------|-----|
| (24) | UK      | January 01, 2019 - December 31, 2019 | January 01,2020 - February 29,2020     | the National Cancer Cancer Waiting Time Monitoring, Monthly Diagnostic, Secondary Uses Service Admitted Patient Care and the National Radiotherapy datasets | Colonoscopy  | 7   |
|      | UK      | January 01, 2019 - December 31, 2019 | March 01, 2020 - March 31, 2020        | the National Cancer Cancer Waiting Time Monitoring, Monthly Diagnostic, Secondary Uses Service Admitted Patient Care and the National Radiotherapy datasets | Colonoscopy  | 7   |
|      | UK      | January 01, 2019 - December 31, 2019 | April 01,2020 - April 30, 2020         | the National Cancer Cancer Waiting Time Monitoring, Monthly Diagnostic, Secondary Uses Service Admitted Patient Care and the National Radiotherapy datasets | Colonoscopy  | 7   |
|      | UK      | January 01, 2019 - December 31, 2019 | May 01 2020 - May 31, 2020             | the National Cancer Cancer Waiting Time Monitoring, Monthly Diagnostic, Secondary Uses Service Admitted Patient Care and the National Radiotherapy datasets | Colonoscopy  | 7   |
|      | UK      | January 01, 2019 - December 31, 2019 | June 1, 2020 - October 31, 2020        | the National Cancer Cancer Waiting Time Monitoring, Monthly Diagnostic, Secondary Uses Service Admitted Patient Care and the National Radiotherapy datasets | Colonoscopy  | 7   |
| (25) | UK      | January 06, 2020 - March 15, 2020    | March 23, 2020 - May 31, 2020          | National Endoscopy Database                                                                                                                                 | Colonoscopy  | 7.5 |
| (26) | China   | October 10, 2019 - January 21, 2020  | January 21, 2020 - March 31, 2020      | Clinical Data Analysis and Reporting System of the Hong Kong Hospital Authority                                                                             | Colonoscopy  | 8   |
| (27) | Italy   | January 01, 2019 - May 31, 2019      | January 01, 2020 - May 31, 2020        | National Screening Observatory                                                                                                                              | FOBT/FIT*    | 6   |
|      | Italy   | June 01, 2019 - September 30, 2019   | June 01, 2020 - September 30, 2020     | National Screening Observatory                                                                                                                              | FOBT/FIT*    | 6   |
| (28) | Italy   | March 01, 2019 - April 30, 2019      | March 01, 2020 - April 30, 2020        | eight endoscopy services in Northern Italy                                                                                                                  | Colonoscopy  | 8   |
| (15) | Canada  | January 01, 2019 - December 31, 2019 | January 01, 2020 - December 31, 2020   | Ontario Health's Laboratory Reporting Tool and FIT Data Submission Portal                                                                                   | FOBT/FIT     | 7.5 |
| (29) | Japan   | January 01, 2017 - February 29, 2020 | March 01, 2020 - December 31, 2020     | Yokohama City University Hospital and the National Hospital Organization Yokohama Medical Center                                                            | Colonoscopy  | 9   |
| (30) | Canada  | March 01, 2019 - June 30, 2019       | March 01, 2020 - June 30, 2020         | GI Endoscopy Data Submission Portal                                                                                                                         | FOBT/FIT     | 9.5 |
|      | Canada  | March 01, 2019 - June 30, 2019       | March 01, 2020 - June 30, 2020         | GI Endoscopy Data Submission Portal                                                                                                                         | Colonoscopy  | 9.5 |
| (20) | USA     | March 19, 2019 - May 09, 2019        | March 19, 2020 - May 09, 2020          | Michigan Medicine (an affiliate of the University of Michigan)                                                                                              | Colonoscopy  | 8   |
|      | USA     | March 19, 2019 - May 09, 2019        | March 19, 2020 - May 09, 2020          | Michigan Medicine (an affiliate of the University of Michigan)                                                                                              | FOBT/FIT     | 8   |
| (18) | Uruguay | March 16, 2019 - June 30, 2019       | March 16, 2020 - June 30, 2020         | Private Provider                                                                                                                                            | FOBT/FIT*    | 9.5 |
| (17) | USA     | January 15, 2020 - March 13, 2020    | April 01,2020 - April 30, 2020         | Castlight Health, US Census data and USAFacts                                                                                                               | Colonoscopy  | 7.5 |
|      | USA     | January 15, 2020 - March 13, 2020    | May 01 2020 - July 31, 2020            | Castlight Health, US Census data and USAFacts                                                                                                               | Colonoscopy  | 7.5 |
| (31) | USA     | December 01, 2019 - March 02, 2020   | September 04, 2020 - December 05, 2020 | Massachusetts General Brigham (MGB) System                                                                                                                  | Colonoscopy* | 8.5 |
| (32) | Italy   | March 11, 2019 - May 05, 2019        | March 09, 2020 - May 04, 2020          | Eight tertiary centres, representative of Northern and Southern Italy                                                                                       | Colonoscopy* | 9.5 |
| (11) | UK      | January 01, 2019 - February 28, 2019 | January 01, 2020 - February 29, 2020   | COVID and Cancer Research Network (CCRN)                                                                                                                    | Colonoscopy  | 9   |

|      |             |                                       |                                       |                                                                    |             |     |
|------|-------------|---------------------------------------|---------------------------------------|--------------------------------------------------------------------|-------------|-----|
|      | UK          | March 01, 2019 - March 31, 2019       | March 01, 2020 - March 31, 2020       | COVID and Cancer Research Network (CCRN)                           | Colonoscopy | 9   |
|      | UK          | April 01, 2019 - April 30, 2019       | April 01, 2020 - April 30, 2020       | COVID and Cancer Research Network (CCRN)                           | Colonoscopy | 9   |
| (33) | South Korea | January 01, 2019 - October 31, 2019   | January 01, 2020 - October 31, 2020   | Screening organizers or leading experts in the Asia-Pacific region | FOBT/FIT    | 8   |
|      | Taiwan      | April 12, 2019 - December 22, 2019    | April 12, 2020 - December 22, 2020    | Screening organizers or leading experts in the Asia-Pacific region | FOBT/FIT    | 8   |
|      | Australia   | January 01, 2019 - September 30, 2019 | January 01, 2020 - September 30, 2020 | Screening organizers or leading experts in the Asia-Pacific region | FOBT/FIT    | 8   |
|      | Australia   | January 01, 2019 - June 30, 2019      | January 01, 2020 - June 30, 2020      | Screening organizers or leading experts in the Asia-Pacific region | Colonoscopy | 8   |
|      | Singapore   | January 01, 2019 - October 31, 2019   | January 01, 2020 - October 31, 2020   | Screening organizers or leading experts in the Asia-Pacific region | Colonoscopy | 8   |
| (34) | USA         | January 29, 2020 - March 17, 2020     | March 18, 2020 - May 04, 2020         | UCLA primary care patients                                         | Colonoscopy | 8.5 |
|      | USA         | January 29, 2020 - March 17, 2020     | March 18, 2020 - May 04, 2020         | UCLA primary care patients                                         | FOBT/FIT    | 8.5 |
|      | USA         | January 29, 2020 - March 17, 2020     | May 05, 2020 - October 27, 2020       | UCLA primary care patients                                         | Colonoscopy | 8.5 |
|      | USA         | January 29, 2020 - March 17, 2020     | May 05, 2020 - October 27, 2020       | UCLA primary care patients                                         | FOBT/FIT    | 8.5 |

\*Observations with impute number of daily events in order to calculate the weighted variation.

**eTable 3.** Characteristics of Cervical Cancer Screening Studies

| Reference | Country     | Contrast period                      | Period on exam                         | Setting and database                                  | Screening method   | Quality assesment |
|-----------|-------------|--------------------------------------|----------------------------------------|-------------------------------------------------------|--------------------|-------------------|
| (35)      | USA         | March 19, 2019 - June 11, 2019       | March 19, 2020 - June 11, 2020         | ECM from Kaiser Permanente Southern California (KPSC) | Pap test/HPV test* | 9.5               |
|           | USA         | January 01, 2019- March 18, 2019     | January 01, 2020 - March 18, 2020      | ECM from Kaiser Permanente Southern California (KPSC) | Pap test/HPV test* | 9.5               |
|           | USA         | June 12, 2019 - September 30, 2019   | June 12, 2020 - September 30, 2020     | ECM from Kaiser Permanente Southern California (KPSC) | Pap test/HPV test* | 9.5               |
| (36)      | Bangladesh  | January 01, 2019 - December 31, 2019 | January 01, 2020 - December 31, 2020   | National cancer screening register (DHIS2)            | Pap test/HPV test* | 8                 |
| (15)      | Canada      | January 01, 2019 - December 31, 2019 | January 01, 2020 - December 31, 2020   | Cytobase                                              | Pap test/HPV test  | 7.5               |
| (31)      | USA         | December 31, 2019 - March 02, 2019   | September 04, 2020 - December 05, 2020 | Massachusetts General Brigham (MGB) Healthcare System | Pap test/HPV test  | 9.5               |
| (18)      | Uruguay     | March 16, 2019 - April 30, 2019      | March 16, 2020 - April 30, 2020        | Oncology Electronic Health Record                     | Pap test/HPV test* | 9.5               |
|           | Uruguay     | May 01, 2019 - May 31, 2019          | May 01, 2020 - May 31, 2020            | Oncology Electronic Health Record                     | Pap test/HPV test* | 9.5               |
|           | Uruguay     | June 01, 2019 - June 30, 2019        | June 01, 2020 - June 30, 2020          | Oncology Electronic Health Record                     | Pap test/HPV test* | 9.5               |
|           | Mexico      | April 01, 2019 - April 30, 2019      | April 01, 2020 - April 30, 2020        | Hospital General de Mèxico, Planning Department       | Pap test/HPV test* | 9.5               |
|           | Mexico      | May 01, 2019 - May 31, 2019          | May 01, 2020 - May 31, 2020            | Hospital General de Mèxico, Planning Department       | Pap test/HPV test* | 9.5               |
|           | Mexico      | June 01, 2019 - June 30, 2019        | June 01, 2020 - June 30, 2020          | Hospital General de Mèxico, Planning Department       | Pap test/HPV test* | 9.5               |
|           | Mexico      | April 01, 2019 - April 30, 2019      | April 01, 2020 - April 30, 2020        | Instituto Nacional del Cancerologia                   | Pap test/HPV test* | 9.5               |
|           | Mexico      | May 01, 2019 - May 31, 2019          | May 01, 2020 - May 31, 2020            | Instituto Nacional del Cancerologia                   | Pap test/HPV test* | 9.5               |
|           | Mexico      | June 01, 2019 - June 30, 2019        | June 01, 2020 - June 30, 2020          | Instituto Nacional del Cancerologia                   | Pap test/HPV test* | 9.5               |
|           | Perù        | March 16, 2019 - April 30, 2019      | March 16, 2020 - April 30, 2020        | IAFAS of Oncosalud                                    | Pap test/HPV test* | 9.5               |
|           | Brazil      | March 16, 2019 - April 30, 2019      | March 16, 2020 - April 30, 2020        | Ministry of Health. DATASUS                           | Pap test/HPV test* | 9.5               |
|           | Brazil      | May 01, 2019 - May 31, 2019          | May 01, 2020 - May 31, 2020            | Ministry of Health. DATASUS                           | Pap test/HPV test* | 9.5               |
|           | Brazil      | June 01, 2019 - June 30, 2019        | June 01, 2020 - June 30, 2020          | Ministry of Health. DATASUS                           | Pap test/HPV test* | 9.5               |
| (20)      | USA         | March 19, 2019 - May 9, 2019         | March 19, 2020 - May 9, 2020           | Private medical center in Mdwest                      | Pap test/HPV test  | 8                 |
| (1)       | Italy       | January 01,2019 - May 31,2019        | January 01, 2020 - May 31,2020         | Regional Database                                     | Pap test/HPV test* | 10                |
| (37)      | Puerto Rico | January 01, 2016 - January 31, 2016  | January 01, 2020 - March 31, 2020      | PR Medicaid claims database                           | Pap test/HPV test  | 9.5               |



|      |             |                                     |                                   |                                                                 |                    |     |
|------|-------------|-------------------------------------|-----------------------------------|-----------------------------------------------------------------|--------------------|-----|
|      | Puerto Rico | January 01, 2016 - January 31, 2016 | January 01, 2020 - March 31, 2020 | PR Medicaid claims database                                     | Pap test/HPV test  | 9.5 |
|      | Puerto Rico | January 01, 2016 - January 31, 2016 | April 01, 2020 - April 30, 2020   | PR Medicaid claims database                                     | Pap test/HPV test  | 9.5 |
|      | Puerto Rico | January 01, 2016 - January 31, 2016 | April 01, 2020 - June 30, 2020    | PR Medicaid claims database                                     | Pap test/HPV test  | 9.5 |
|      | Puerto Rico | January 01, 2016 - January 31, 2016 | April 01, 2020 - June 30, 2020    | PR Medicaid claims database                                     | Pap test/HPV test  | 9.5 |
| (5)  | USA         | April 01, 2019 - April 30, 2019     | April 01, 2020 - April 30, 2020   | The National Breast and Cervical Cancer Early Detection Program | Pap test/HPV test  | 9.5 |
|      | USA         | June 01, 2019 - June 30, 2019       | June 01, 2020 - June 30, 2020     | The National Breast and Cervical Cancer Early Detection Program | Pap test/HPV test  | 9.5 |
| (38) | Italy       | January 01, 2019 - March 08, 2019   | January 01, 2020 - March 08, 2020 | Department of Medical Sciences, University of Ferrara           | Pap test/HPV test  | 9   |
|      | Italy       | March 09, 2019 - June 30, 2019      | March 09, 2020 - June 30, 2020    | Department of Medical Sciences, University of Ferrara           | Pap test/HPV test  | 9   |
|      | Italy       | July 01, 2019 - December 31, 2019   | July 01, 2020 - December 31, 2020 | Department of Medical Sciences, University of Ferrara           | Pap test/HPV test  | 9   |
| (39) | Canada      | March 01, 2019 - March 31, 2019     | March 01, 2020 - March 31, 2020   | CytoBase                                                        | Pap test/HPV test* | 9.5 |
|      | Canada      | April 01, 2019 - April 30, 2019     | April 01, 2020 - April 30, 2020   | CytoBase                                                        | Pap test/HPV test* | 9.5 |
|      | Canada      | May 01 2019 - May 31, 2019          | May 01 2020 - May 31, 2020        | CytoBase                                                        | Pap test/HPV test* | 9.5 |
|      | Canada      | June 01, 2019 - August 31, 2019     | June 01, 2020 - August 31, 2020   | CytoBase                                                        | Pap test/HPV test* | 9.5 |

\*Observations with impute number of daily events in order to calculate the weighted variation.

**eTable 4.** Weighted Average Variation of Screening Tests Performed From January to October 2020 Compared With the Prepandemic, Divided by Cancer Type, and by Periods and Overall Interval

|                         | <b>Breast cancer screening (CI 95%)</b> | <b>Colorectal cancer screening (CI 95%)</b> | <b>Cervical cancer screening (CI 95%)</b> |
|-------------------------|-----------------------------------------|---------------------------------------------|-------------------------------------------|
| <b>January-February</b> | -27.1% (-51.2, -3.0)                    | -30.6% (-45.4, -15.8)                       | -36.1% (-54.8, -17.4)                     |
| <b>March</b>            | -57.5% (-71.8, -43.3)                   | -54.8% (-69.7, -40.0)                       | -78.8% (-99.3, -58.3)                     |
| <b>April</b>            | -74.3% (-91.8, -56.7)                   | -69.3% (-100.0, -36.9)                      | -67.8% (-90.3, -45.3)                     |
| <b>May</b>              | -45.2% (-59.9, -30.4)                   | -50.5% (-77.7, -23.3)                       | -77.1% (-92.3, -61.9)                     |
| <b>June-October</b>     | -13.0% (-33.0, 7.1)                     | -23.4% (-44.4, -2.4)                        | -17.8% (-53.8, 18.2)                      |
| <b>January-October</b>  | -46.7% (-55.5, -37.8)                   | -44.9% (-53.8, -36.1)                       | -51.8% (-64.7, -38.9)                     |

## eReferences

1. Mantellini P, Battisti F, Armaroli P, Giubilato P, Ventura L, Zorzi M, et al. [Oncological organized screening programmes in the COVID-19 era: an Italian survey on accrued delays, reboot velocity, and diagnostic delay estimates]. *Epidemiol Prev*. 2020 Dec;44(5-6 Suppl 2):344–52.
2. Chen RC, Haynes K, Du S, Barron J, Katz AJ. Association of Cancer Screening Deficit in the United States With the COVID-19 Pandemic. *JAMA Oncol*. 2021 Jun 1;7(6):878–84.
3. Fedewa SA, Cotter MM, Wehling KA, Wysocki K, Killewald R, Makaroff L. Changes in breast cancer screening rates among 32 community health centers during the COVID-19 pandemic. *Cancer*. 2021 Dec 1;127(23):4512–5.
4. Sprague BL, Lowry KP, Miglioretti DL, Alsheik N, Bowles EJA, Tosteson ANA, et al. Changes in Mammography Use by Women’s Characteristics During the First 5 Months of the COVID-19 Pandemic. *J Natl Cancer Inst*. 2021 Sep 4;113(9):1161–7.
5. DeGroff A, Miller J, Sharma K, et al. COVID-19 impact on screening test volume through the National Breast and Cervical Cancer early detection program, January-June 2020, in the United States. *Prev Med*. 2021 Oct;151:106559.
6. McBain RK, Cantor JH, Jena AB, Pera MF, Bravata DM, Whaley CM. Decline and Rebound in Routine Cancer Screening Rates During the COVID-19 Pandemic. *J Gen Intern Med*. 2021 Jun;36(6):1829–31.
7. Koca B, Yildirim M. Delay in breast cancer diagnosis and its clinical consequences during the coronavirus disease pandemic. *J Surg Oncol*. 2021 Sep;124(3):261–7.
8. Song H, Bergman A, Chen AT, Ellis D, David G, Friedman AB, et al. Disruptions in preventive care: Mammograms during the COVID-19 pandemic. *Health Serv Res*. 2021 Feb;56(1):95–101.
9. Brugel M, Carlier C, Essner C, et al. Dramatic Changes in Oncology Care Pathways During the COVID-19 Pandemic: The French ONCO-CARE-COV Study. *The Oncologist*. 2021 Feb;26(2):e338–41.
10. Tsai H-Y, Chang Y-L, Shen C-T, Chung W-S, Tsai H-J, Chen F-M. Effects of the COVID-19 pandemic on breast cancer screening in Taiwan. *Breast Edinb Scotl*. 2020 Dec;54:52–5.
11. London JW, Fazio-Eynullayeva E, Palchuk MB, Sankey P, McNair C. Effects of the COVID-19 Pandemic on Cancer-Related Patient Encounters. *JCO Clin Cancer Inform*. 2020 Jul;4:657–65.
12. Patt D, Gordan L, Diaz M, et al. Impact of COVID-19 on Cancer Care: How the Pandemic Is Delaying Cancer Diagnosis and Treatment for American Seniors. *JCO Clin Cancer Inform*. 2020 Nov;4:1059–71.
13. Peng S-M, Yang K-C, Chan WP, et al. Impact of the COVID-19 pandemic on a population-based breast cancer screening program. *Cancer*. 2020 Dec 15;126(24):5202–5.
14. Miller MM, Meneveau MO, Rochman CM, et al. Impact of the COVID-19 pandemic on breast cancer screening volumes and patient screening behaviors. *Breast Cancer Res Treat*. 2021 Aug;189(1):237–46.
15. Walker MJ, Meggetto O, Gao J, et al. Measuring the impact of the COVID-19 pandemic on organized cancer screening and diagnostic follow-up care in Ontario, Canada: A provincial, population-based study. *Prev Med*. 2021 Oct;151:106586.
16. Nyante SJ, Benefield TS, Kuzmiak CM, Earnhardt K, Pritchard M, Henderson LM. Population-level impact of coronavirus disease 2019 on breast cancer screening and diagnostic procedures. *Cancer*. 2021 Jun 15;127(12):2111–21.
17. Fillon M. Routine Cancer Screening Rates Rebound After Deep Drop From Pandemic Fear. *CA Cancer J Clin*. 2021 Sep;71(5):366–8.
18. Vázquez Rosas T, Cazap E, Delgado L, et al. Social Distancing and Economic Crisis During COVID-19 Pandemic Reduced Cancer Control in Latin America and Will Result in Increased Late-Stage Diagnoses and Expense. *JCO Glob Oncol*. 2021 May;7:694–703.

19. Amram O, Robison J, Amiri S, Pflugeisen B, Roll J, Monsivais P. Socioeconomic and Racial Inequities in Breast Cancer Screening During the COVID-19 Pandemic in Washington State. *JAMA Netw Open*. 2021 May 3;4(5):e2110946.
20. Gorin SNS, Jimbo M, Heizelman R, Harnes KM, Harper DM. The future of cancer screening after COVID-19 may be at home. *Cancer*. 2021 Feb 15;127(4):498–503.
21. Velazquez AI, Hayward JH, Gregory B, Dixit N. Trends in Breast Cancer Screening in a Safety-Net Hospital During the COVID-19 Pandemic. *JAMA Netw Open*. 2021 Aug 2;4(8):e2119929.
22. Raj Kumar B, Pandey D, Rohila J, deSouza A, Saklani A. An observational study of the demographic and treatment changes in a tertiary colorectal cancer center during the COVID-19 pandemic. *J Surg Oncol*. 2020 Dec;122(7):1271–5.
23. Challine A, Lazzati A, Katsahian S, Parc Y, Lefevre JH. Colorectal screening: We have not caught up. A surge of colorectal cancer after the coronavirus disease 2019 (COVID-19) pandemic? *Surgery*. 2021 Jul;170(1):349–50.
24. Morris EJA, Goldacre R, Spata E, et al. Impact of the COVID-19 pandemic on the detection and management of colorectal cancer in England: a population-based study. *Lancet Gastroenterol Hepatol*. 2021 Mar;6(3):199–208.
25. Rutter MD, Brookes M, Lee TJ, Rogers P, Sharp L. Impact of the COVID-19 pandemic on UK endoscopic activity and cancer detection: a National Endoscopy Database Analysis. *Gut*. 2021 Mar;70(3):537–43.
26. Lui TKL, Leung K, Guo C-G, Tsui VWM, Wu JT, Leung WK. Impacts of the Coronavirus 2019 Pandemic on Gastrointestinal Endoscopy Volume and Diagnosis of Gastric and Colorectal Cancers: A Population-Based Study. *Gastroenterology*. 2020 Sep;159(3):1164-1166.e3.
27. Laghi L, Cameletti M, Ferrari C, Ricciardiello L. Impairment of colorectal cancer screening during the COVID-19 pandemic. *Lancet Gastroenterol Hepatol*. 2021 Jun;6(6):425–6.
28. Manes G, Saibeni S, Pellegrini L, et al. Improvement in appropriateness and diagnostic yield of fast-track endoscopy during the COVID-19 pandemic in Northern Italy. *Endoscopy*. 2021 Feb;53(2):162–5.
29. Kuzuu K, Misawa N, Ashikari K, et al. Gastrointestinal Cancer Stage at Diagnosis Before and During the COVID-19 Pandemic in Japan. *JAMA Netw Open*. 2021 Sep 1;4(9):e2126334.
30. Timmouth J, Dong S, Stogios C, et al. Estimating the Backlog of Colonoscopy due to Coronavirus Disease 2019 and Comparing Strategies to Recover in Ontario, Canada. *Gastroenterology*. 2021 Mar;160(4):1400-1402.e1.
31. Labaki C, Bakouny Z, Schmidt A, et al. Recovery of cancer screening tests and possible associated disparities after the first peak of the COVID-19 pandemic. *Cancer Cell*. 2021 Aug 9;39(8):1042–4.
32. Furnari M, Eusebi LH, Savarino E, et al. Effects of SARS-CoV-2 emergency measures on high-risk lesions detection: a multicentre cross-sectional study. *Gut*. 2021 Jul;70(7):1241–3.
33. Chiu H-M, Su C-W, Hsu W-F, et al. Mitigating the impact of COVID-19 on colorectal cancer screening: Organized service screening perspectives from the Asia-Pacific region. *Prev Med*. 2021 Oct;151:106622.
34. Myint A, Roh L, Yang L, Connolly L, Esrailian E, May FP. Noninvasive Colorectal Cancer Screening Tests Help Close Screening Gaps During Coronavirus Disease 2019 Pandemic. *Gastroenterology*. 2021 Aug;161(2):712-714.e1.
35. Miller MJ, Xu L, Qin J, et al. Impact of COVID-19 on Cervical Cancer Screening Rates Among Women Aged 21-65 Years in a Large Integrated Health Care System - Southern California, January 1-September 30, 2019, and January 1-September 30, 2020. *MMWR Morb Mortal Wkly Rep*. 2021 Jan 29;70(4):109–13.
36. Basu P, Lucas E, Zhang L, Muwonge R, Murillo R, Nessa A. Leveraging vertical COVID-19 investments to improve monitoring of cancer screening programme - A case study from Bangladesh. *Prev Med*. 2021 Oct;151:106624.

37. Ortiz AP, Gierbolini-Bermúdez A, Ramos-Cartagena JM, et al. Cervical Cancer Screening Among Medicaid Patients During Natural Disasters and the COVID-19 Pandemic in Puerto Rico, 2016 to 2020. *JAMA Netw Open*. 2021 Oct 1;4(10):e2128806.
38. Acuti Martellucci C, Morettini M, Flacco ME, et al. Delivering cervical cancer screening during the COVID-19 emergency. *BMJ Sex Reprod Health*. 2021 Oct;47(4):296–9.
39. Meggetto O, Jembere N, Gao J, et al. The impact of the COVID-19 pandemic on the Ontario Cervical Screening Program, colposcopy and treatment services in Ontario, Canada: a population-based study. *BJOG Int J Obstet Gynaecol*. 2021 Aug;128(9):1503–10.
